# Supplementary material for: Perspectives From Working Parents of Children With Recurrent Acute Otitis Media During The COVID-19 Era: A Qualitative Study
Source: Research Square preprint supplement (doi:10.21203/rs.3.rs-228855/v1), 2021-03-10
Supplement: Supplementary file 2 [file 22757522edd99d71a0a44656.xlsx]

## Sheet: Sheet1
	Participant (N = 11)	Number of Children	Participant Age	Highest Level of Education Completed	Employment Status
	1	2	35	Graduate/Medical School	Employed
	2	1	39	Graduate/Medical School	Employed
	3	2	38	Graduate/Medical School	Employed
	4	3	35	Graduate/Medical School	Employed
	5	3	35	Graduate/Medical School	Employed
	6	2	37	Graduate/Medical School	Employed
	7	1	40	College/University	Employed
	8	2	45	Graduate/Medical School	Employed
	9	2	37	Graduate/Medical School	Employed
	10	3	39	Graduate/Medical School	Employed
	11	2	39	College/University	Employed
